# Supplementary material
Source: Research Square preprint supplement (doi:10.21203/rs.3.rs-9415864/v1)
Supplement: Supplementary file 1 [file 3bea493fb69ceabfb3e78de8.docx]

| **Supplementary table 1**. Hierarchical multiple regressions predicting appendicular lean soft mass including age, sex, and stature as covariates. | | | | | | | | |
| --- | --- | --- | --- | --- | --- | --- | --- | --- |
| Order | Step | Predictors added at this step | R² | Adj.R² | ΔR² | F-change | p |
| Anthropometry - BIA - US | 1 | Age, Sex, Stature | 0.79 | 0.78 | 0.79 | 87.90 | <0.001 |
|  | 2 | + Anthropometry (Arm relaxed girth, thigh girth, calf girth) | 0.90 | 0.89 | 0.10 | 21.57 | <0.001 |
|  | 3 | + BIA (R, PhA) | 0.95 | 0.94 | 0.05 | 32.93 | <0.001 |
|  | 4 | + US (Biceps SMTT, RF SMTT, calf SMTT) | 0.95 | 0.94 | 0.00 | 1.43 | 0.244 |
| Anthropometry - US - BIA | 1 | Age, Sex, Stature | 0.79 | 0.78 | 0.79 | 87.90 | <0.001 |
|  | 2 | + Anthropometry (Arm relaxed, thigh, calf girth) | 0.90 | 0.89 | 0.10 | 21.57 | <0.001 |
|  | 3 | + US (Biceps SMTT, RF SMTT, calf SMTT) | 0.92 | 0.91 | 0.03 | 6.67 | <0.001 |
|  | 4 | + BIA (R, PhA) | 0.95 | 0.94 | 0.03 | 19.75 | <0.001 |
| BIA - Anthropometry -US | 1 | Age, Sex, Stature | 0.79 | 0.78 | 0.79 | 87.90 | <0.001 |
|  | 2 | + BIA (R, PhA) | 0.91 | 0.91 | 0.12 | 48.22 | <0.001 |
|  | 3 | + Anthropometry (Arm relaxed girth, thigh girth, calf girth) | 0.95 | 0.94 | 0.03 | 13.81 | <0.001 |
|  | 4 | + US (Biceps SMTT, RF SMTT, calf SMTT) | 0.95 | 0.94 | 0.00 | 1.43 | 0.244 |
| BIA - US -Anthropometry | 1 | Age, Sex, Stature | 0.79 | 0.78 | 0.79 | 87.90 | <0.001 |
|  | 2 | + BIA (R, PhA) | 0.91 | 0.91 | 0.12 | 48.22 | <0.001 |
|  | 3 | + US (Biceps SMTT, RF SMTT, calf SMTT) | 0.93 | 0.92 | 0.15 | 4.600 | 0.006 |
|  | 4 | + Anthropometry (Arm relaxed girth, thigh girth, calf girth) | 0.95 | 0.94 | 0.22 | 9.156 | <0.001 |
| US - Anthropometry -BIA | 1 | Age, Sex, Stature | 0.79 | 0.78 | 0.79 | 87.90 | <0.001 |
|  | 2 | + US (Biceps SMTT, RF SMTT, calf SMTT) | 0.89 | 0.88 | 0.10 | 19.15 | <0.001 |
|  | 3 | + Anthropometry (Arm relaxed girth, thigh girth) | 0.92 | 0.90 | 0.31 | 8.30 | <0.001 |
|  | 4 | + BIA (R, PhA) | 0.95 | 0.94 | 0.03 | 19.75 | <0.001 |
| US - BIA -Anthropometry | 1 | Age, Sex, Stature | 0.79 | 0.78 | 0.79 | 87.90 | <0.001 |
|  | 2 | + US (Biceps SMTT, RF SMTT, calf SMTT) | 0.89 | 0.88 | 0.10 | 19.15 | <0.001 |
|  | 3 | + BIA (R, PhA) | 0.93 | 0.92 | 0.04 | 18.72 | <0.001 |
|  | 4 | + Anthropometry (Arm relaxed arm girth, thigh girth) | 0.95 | 0.94 | 0.22 | 9.156 | <0.001 |
| Abbreviations: RF,rectus femoris; BIA, bioelectrical impedance analysis; US, ultrasound; PhA, phase angle; R, resistance; SMTT, subcutaneous muscle tissue thickness; Adj R², adjusted coefficient of determination. | | | | | | | | |
